# Supplementary material
Source: PubMed Central journal article supplement (PMC3197859)
Supplement: NIHMS215773-supplement-03.pdf [file NIHMS215773-supplement-03.pdf]

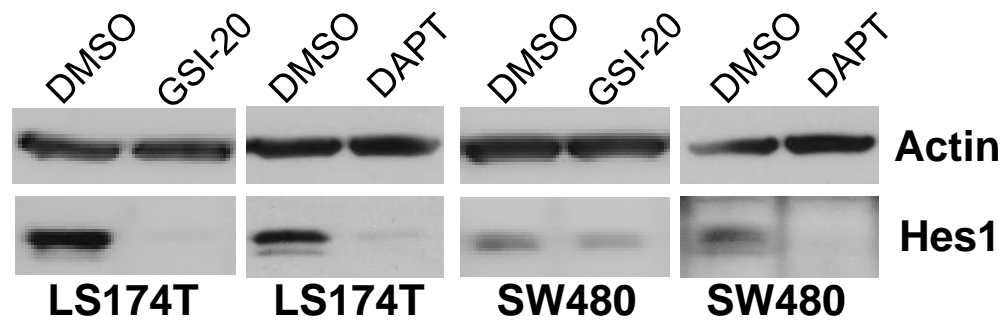

Kazanjan, et al. Supplemental Figure 1

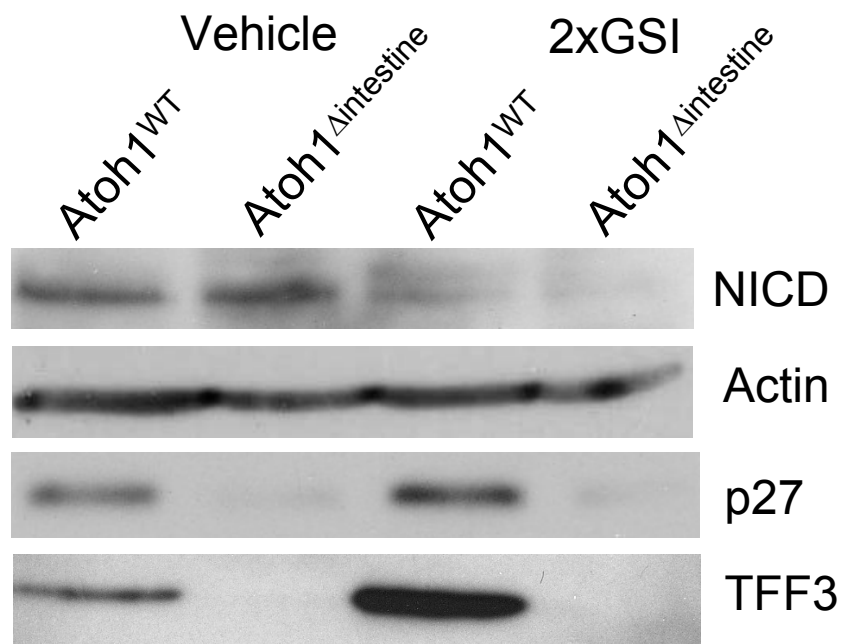

Kazanjan, et al. Supplemental Figure 2

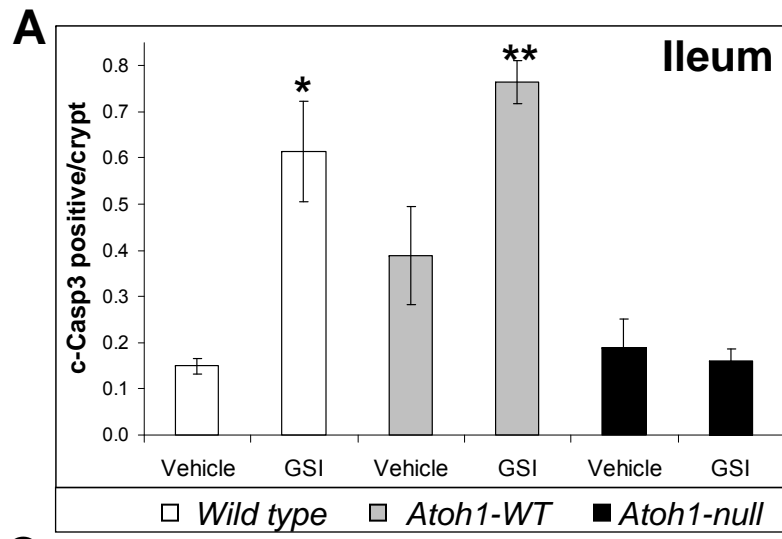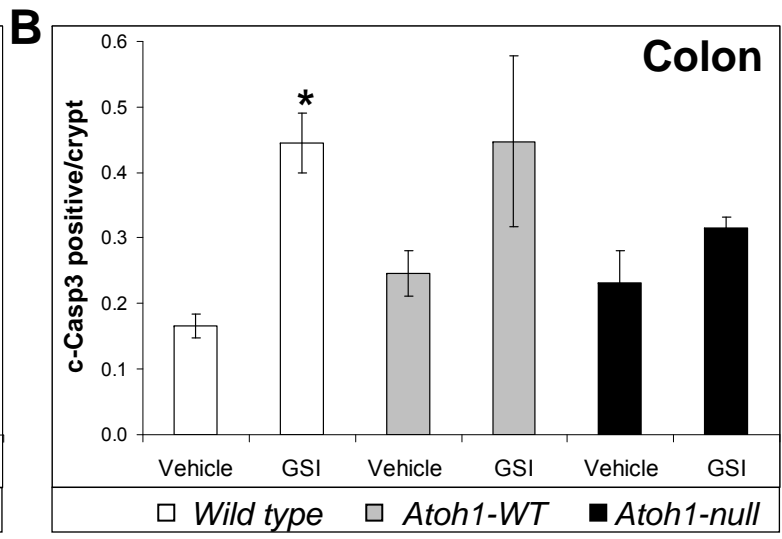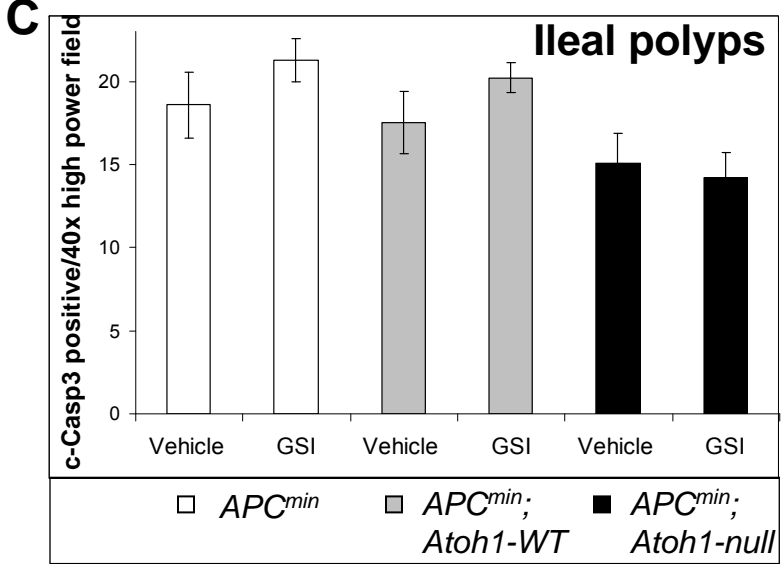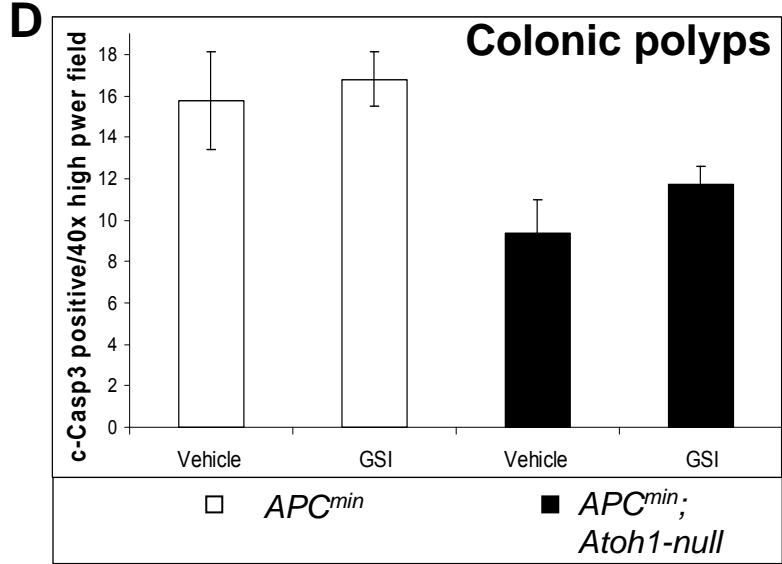

Kazanjan, et al. Supplemental Figure 3

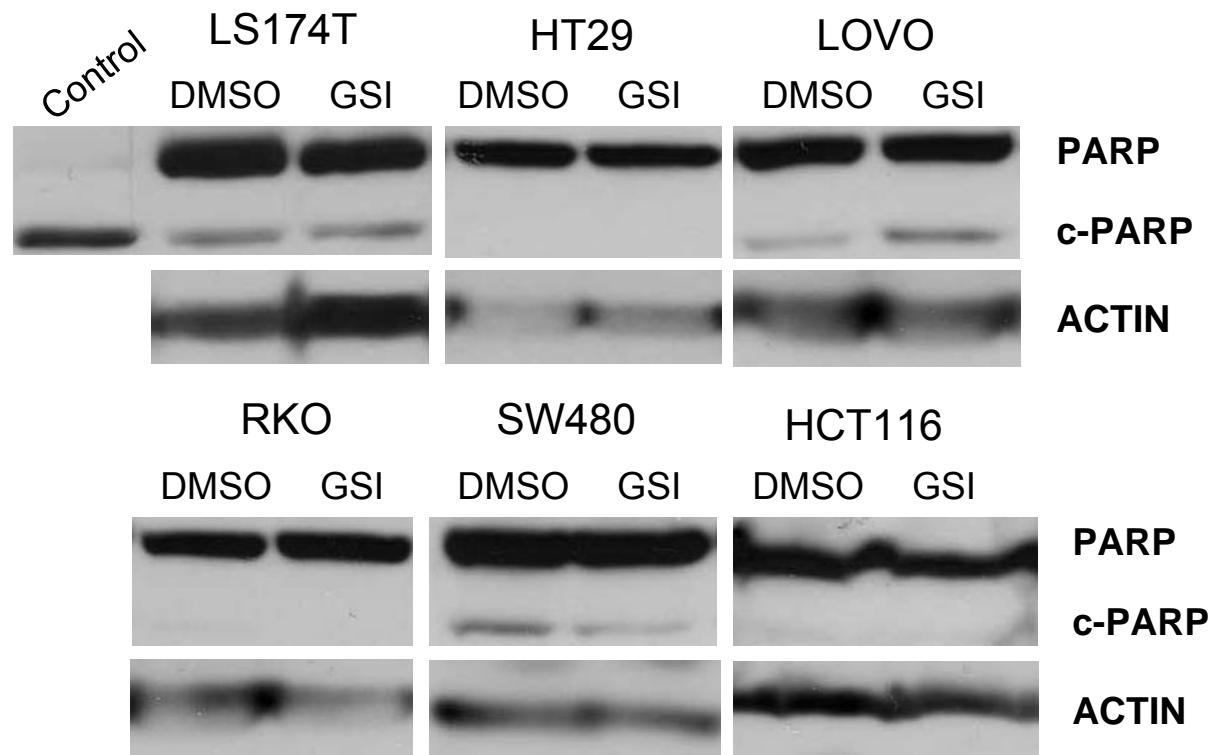

Kazanjan, et al. Supplemental Figure 4

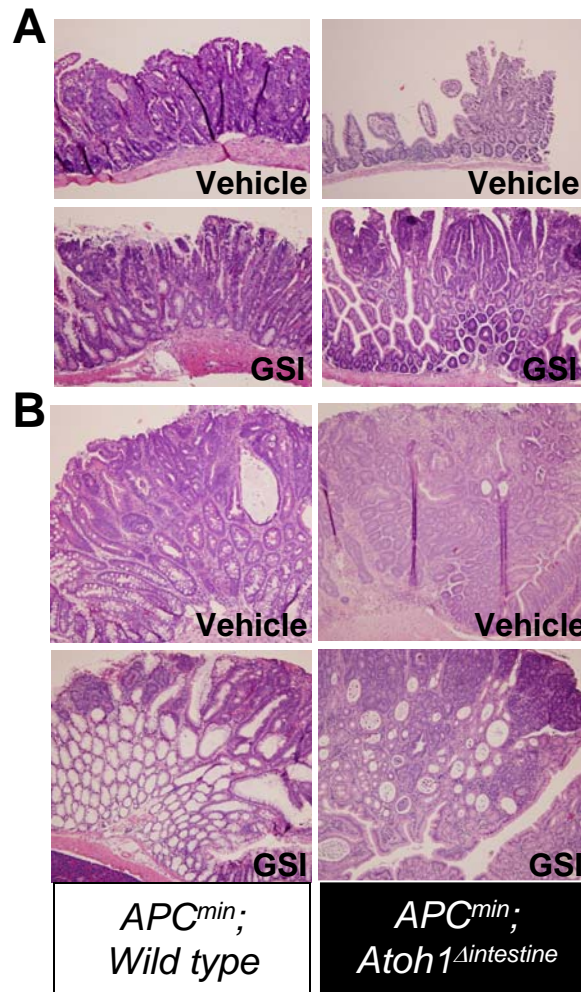

Kazanjan, et al. Supplemental Figure 5

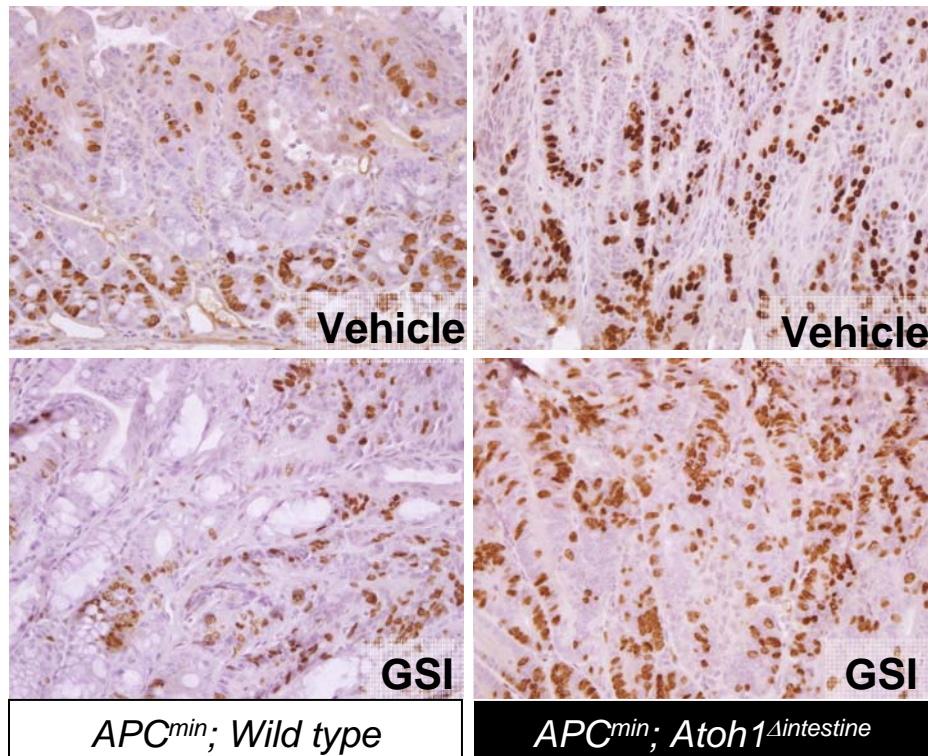

Kazanjan, et al. Supplemental Figure 6
